# Supplementary material for: Deep Eutectic Solvents Formed by Glycerol and Xylitol, Fructose and Sorbitol: Effect of the Different Sugars in Their Physicochemical Properties
Source: MDPI journal article supplement (doi:10.3390/molecules28166023), 2023-08-11
Supplement: s1 [file s1]

**Table S1.** Experimental and some derived thermophysical properties of deep eutectic solvents as a function of the temperature,  $T$ , at atmospheric pressure,  $p = 0.1$  MPa.<sup>a</sup>

| $T / \text{K}$                   | $\rho / (\text{kg}\cdot\text{m}^{-3})$ | $u / (\text{m}\cdot\text{s}^{-1})$ | $\kappa_{\text{S}} / \text{TPa}^{-1}$ | $n_{\text{D}}$ | $R_{\text{m}} / (\text{cm}^3\cdot\text{mol}^{-1})$ | $\sigma / (\text{mN}\cdot\text{m}^{-1})$ | $C_{\text{p,m}} / (\text{J}\cdot\text{mol}^{-1}\cdot\text{K}^{-1})$ | $\nu / (\text{mm}^2\cdot\text{s}^{-1})$ | $\eta / (\text{mPa}\cdot\text{s})$ |
|----------------------------------|----------------------------------------|------------------------------------|---------------------------------------|----------------|----------------------------------------------------|------------------------------------------|---------------------------------------------------------------------|-----------------------------------------|------------------------------------|
| Xylitol: glycerol: water (1:2:3) |                                        |                                    |                                       |                |                                                    |                                          |                                                                     |                                         |                                    |
| 278.15                           | 1287.71                                |                                    |                                       |                |                                                    | 60.54                                    | 148.8                                                               | 1525                                    | 1964                               |
| 280.65                           | 1286.17                                |                                    |                                       |                |                                                    | 59.90                                    | 149.6                                                               | 1160                                    | 1492                               |
| 283.15                           | 1284.62                                |                                    |                                       | 1.469597       | 14.120                                             | 59.23                                    | 150.1                                                               | 882.6                                   | 1134                               |
| 285.65                           | 1283.06                                |                                    |                                       | 1.469056       | 14.124                                             | 58.82                                    | 151.0                                                               | 700.1                                   | 898.2                              |
| 288.15                           | 1281.50                                |                                    |                                       | 1.468507       | 14.127                                             | 58.35                                    | 151.7                                                               | 556.0                                   | 712.5                              |
| 290.65                           | 1279.92                                |                                    |                                       | 1.467923       | 14.129                                             | 57.64                                    | 152.5                                                               | 443.0                                   | 567.0                              |
| 293.15                           | 1278.36                                |                                    |                                       | 1.467329       | 14.131                                             | 57.32                                    | 153.2                                                               | 355.5                                   | 454.5                              |
| 295.65                           | 1276.80                                |                                    |                                       | 1.466738       | 14.133                                             | 56.64                                    | 153.9                                                               | 287.7                                   | 367.3                              |
| 298.15                           | 1275.22                                | 1961.35                            | 203.85                                | 1.466138       | 14.134                                             | 56.24                                    | 154.8                                                               | 232.7                                   | 296.7                              |
| 300.65                           | 1273.63                                | 1955.89                            | 205.24                                | 1.465541       | 14.137                                             | 55.51                                    | 155.5                                                               | 191.1                                   | 243.4                              |
| 303.15                           | 1272.03                                | 1950.39                            | 206.66                                | 1.464932       | 14.138                                             | 55.07                                    | 156.4                                                               | 159.1                                   | 202.4                              |
| 305.65                           | 1270.41                                | 1945.00                            | 208.07                                | 1.464318       | 14.140                                             | 54.47                                    | 157.0                                                               | 132.7                                   | 168.5                              |
| 308.15                           | 1268.79                                | 1939.63                            | 209.49                                | 1.463704       | 14.142                                             | 53.93                                    | 157.8                                                               | 111.8                                   | 141.9                              |
| 310.65                           | 1267.16                                | 1934.27                            | 210.93                                | 1.463084       | 14.144                                             | 53.27                                    | 158.6                                                               | 93.94                                   | 119.0                              |
| 313.15                           | 1265.51                                | 1928.90                            | 212.38                                | 1.462470       | 14.146                                             | 52.80                                    | 159.4                                                               | 80.25                                   | 101.6                              |
| 315.65                           | 1263.87                                | 1923.52                            | 213.85                                | 1.461846       | 14.148                                             | 52.24                                    | 160.2                                                               | 68.19                                   | 86.18                              |
| 318.15                           | 1262.22                                | 1918.13                            | 215.33                                | 1.461212       | 14.150                                             | 51.70                                    | 160.7                                                               | 58.83                                   | 74.25                              |
| 320.65                           | 1260.56                                | 1912.71                            | 216.84                                | 1.460577       | 14.152                                             | 51.12                                    | 161.7                                                               | 43.23                                   | 54.50                              |
| 323.15                           | 1258.90                                | 1907.25                            | 218.37                                | 1.459927       | 14.153                                             | 50.60                                    | 162.4                                                               | 40.06                                   | 50.43                              |
| 325.65                           | 1257.23                                | 1901.75                            | 219.93                                | 1.459285       | 14.155                                             | 49.97                                    | 163.1                                                               | 35.33                                   | 44.42                              |
| 328.15                           | 1255.56                                | 1896.21                            | 221.51                                | 1.458636       | 14.157                                             | 49.50                                    | 163.8                                                               | 31.17                                   | 39.13                              |

**Table S1.** Continuation.

| $T / \text{K}$                    | $\rho / (\text{kg}\cdot\text{m}^{-3})$ | $u / (\text{m}\cdot\text{s}^{-1})$ | $\kappa_{\text{S}} / \text{TPa}^{-1}$ | $n_{\text{D}}$ | $R_{\text{m}} / (\text{cm}^3\cdot\text{mol}^{-1})$ | $\sigma / (\text{mN}\cdot\text{m}^{-1})$ | $C_{\text{p,m}} / (\text{J}\cdot\text{mol}^{-1}\cdot\text{K}^{-1})$ | $\nu / (\text{mm}^2\cdot\text{s}^{-1})$ | $\eta / (\text{mPa}\cdot\text{s})$ |
|-----------------------------------|----------------------------------------|------------------------------------|---------------------------------------|----------------|----------------------------------------------------|------------------------------------------|---------------------------------------------------------------------|-----------------------------------------|------------------------------------|
| 330.65                            | 1253.87                                | 1890.62                            | 223.12                                | 1.457979       | 14.158                                             | 49.26                                    | 164.6                                                               | 27.67                                   | 34.69                              |
| 333.15                            | 1252.18                                | 1884.99                            | 224.76                                | 1.457326       | 14.160                                             | 48.71                                    | 165.4                                                               | 24.68                                   | 30.91                              |
| 335.65                            | 1250.49                                | 1879.34                            | 226.42                                | 1.456674       | 14.162                                             | 48.16                                    | 166.3                                                               | 22.02                                   | 27.54                              |
| 338.15                            | 1248.78                                | 1873.63                            | 228.11                                | 1.456012       | 14.163                                             | 47.61                                    | 166.8                                                               | 19.75                                   | 24.66                              |
| Fructose: glycerol: water (1:2:3) |                                        |                                    |                                       |                |                                                    |                                          |                                                                     |                                         |                                    |
| 278.15                            | 1343.18                                |                                    |                                       |                |                                                    | 62.40                                    | 150.6                                                               | 4986                                    | 6697                               |
| 280.65                            | 1341.46                                |                                    |                                       |                |                                                    | 61.76                                    | 151.5                                                               | 3707                                    | 4973                               |
| 283.15                            | 1339.69                                |                                    |                                       | 1.482363       | 14.849                                             | 61.21                                    | 152.8                                                               | 2785                                    | 3731                               |
| 285.65                            | 1337.90                                |                                    |                                       | 1.481670       | 14.850                                             | 60.54                                    | 153.8                                                               | 2116                                    | 2831                               |
| 288.15                            | 1336.36                                |                                    |                                       | 1.481095       | 14.852                                             | 60.05                                    | 154.9                                                               | 1619                                    | 2163                               |
| 290.65                            | 1334.80                                |                                    |                                       | 1.480486       | 14.854                                             | 59.13                                    | 156.1                                                               | 1247                                    | 1664                               |
| 293.15                            | 1333.22                                |                                    |                                       | 1.479862       | 14.855                                             | 58.67                                    | 157.2                                                               | 963.8                                   | 1285                               |
| 295.65                            | 1331.53                                |                                    |                                       | 1.479215       | 14.856                                             | 57.79                                    | 158.5                                                               | 765.3                                   | 1019                               |
| 298.15                            | 1329.61                                | 1987.57                            | 190.38                                | 1.478453       | 14.858                                             | 57.23                                    | 159.9                                                               | 604.7                                   | 804.2                              |
| 300.65                            | 1327.92                                | 1981.06                            | 191.88                                | 1.477790       | 14.859                                             | 56.74                                    | 160.7                                                               | 481.7                                   | 639.9                              |
| 303.15                            | 1326.14                                | 1974.90                            | 193.34                                | 1.477130       | 14.861                                             | 55.90                                    | 161.9                                                               | 378.8                                   | 502.4                              |
| 305.65                            | 1324.42                                | 1968.24                            | 194.90                                | 1.476440       | 14.862                                             | 55.49                                    | 163.2                                                               | 305.9                                   | 405.2                              |
| 308.15                            | 1322.62                                | 1961.81                            | 196.45                                | 1.475784       | 14.865                                             | 54.95                                    | 164.5                                                               | 249.7                                   | 330.3                              |
| 310.65                            | 1320.86                                | 1955.01                            | 198.08                                | 1.475079       | 14.866                                             | 54.25                                    | 165.3                                                               | 205.6                                   | 271.5                              |
| 313.15                            | 1319.05                                | 1948.60                            | 199.66                                | 1.474413       | 14.868                                             | 53.42                                    | 166.5                                                               | 170.6                                   | 225.0                              |
| 315.65                            | 1317.34                                | 1942.39                            | 201.20                                | 1.473740       | 14.869                                             | 53.17                                    | 167.7                                                               | 142.6                                   | 187.9                              |
| 318.15                            | 1315.51                                | 1936.24                            | 202.76                                | 1.473044       | 14.871                                             | 52.40                                    | 168.9                                                               | 120.0                                   | 157.9                              |
| 320.65                            | 1313.67                                | 1930.10                            | 204.34                                | 1.472352       | 14.873                                             | 51.99                                    | 170.2                                                               | 101.6                                   | 133.5                              |
| 323.15                            | 1311.82                                | 1924.00                            | 205.93                                | 1.471641       | 14.875                                             | 51.02                                    | 171.1                                                               | 86.64                                   | 113.7                              |

**Table S1.** Continuation.

| $T / \text{K}$                    | $\rho / (\text{kg}\cdot\text{m}^{-3})$ | $u / (\text{m}\cdot\text{s}^{-1})$ | $\kappa_{\text{S}} / \text{TPa}^{-1}$ | $n_{\text{D}}$ | $R_{\text{m}} / (\text{cm}^3\cdot\text{mol}^{-1})$ | $\sigma / (\text{mN}\cdot\text{m}^{-1})$ | $C_{\text{p,m}} / (\text{J}\cdot\text{mol}^{-1}\cdot\text{K}^{-1})$ | $\nu / (\text{mm}^2\cdot\text{s}^{-1})$ | $\eta / (\text{mPa}\cdot\text{s})$ |
|-----------------------------------|----------------------------------------|------------------------------------|---------------------------------------|----------------|----------------------------------------------------|------------------------------------------|---------------------------------------------------------------------|-----------------------------------------|------------------------------------|
| 325.65                            | 1309.96                                | 1917.89                            | 207.54                                | 1.470917       | 14.877                                             | 50.51                                    | 172.3                                                               | 74.18                                   | 97.17                              |
| 328.15                            | 1308.11                                | 1911.80                            | 209.16                                | 1.470218       | 14.879                                             | 49.86                                    | 173.5                                                               | 64.02                                   | 83.74                              |
| 330.65                            | 1306.25                                | 1905.69                            | 210.80                                | 1.469483       | 14.880                                             | 49.74                                    | 174.9                                                               | 55.50                                   | 72.50                              |
| 333.15                            | 1304.48                                | 1899.54                            | 212.45                                | 1.468796       | 14.881                                             | 49.11                                    | 175.8                                                               | 48.48                                   | 63.24                              |
| 335.65                            | 1302.71                                | 1893.36                            | 214.13                                | 1.468130       | 14.884                                             | 48.49                                    | 177.0                                                               | 42.42                                   | 55.25                              |
| 338.15                            | 1300.98                                | 1887.18                            | 215.83                                | 1.467493       | 14.886                                             | 47.86                                    | 178.0                                                               | 37.35                                   | 48.58                              |
| Sorbitol: glycerol: water (1:2:3) |                                        |                                    |                                       |                |                                                    |                                          |                                                                     |                                         |                                    |
| 278.15                            | 1312.62                                |                                    |                                       |                |                                                    | 69.97                                    | 161.9                                                               | 4435                                    | 5821                               |
| 280.65                            | 1311.10                                |                                    |                                       |                |                                                    | 68.99                                    | 162.6                                                               | 3277                                    | 4296                               |
| 283.15                            | 1309.57                                |                                    |                                       | 1.478796       | 15.167                                             | 67.93                                    | 163.4                                                               | 2485                                    | 3254                               |
| 285.65                            | 1308.04                                |                                    |                                       | 1.478168       | 15.168                                             | 66.93                                    | 164.3                                                               | 1891                                    | 2474                               |
| 288.15                            | 1306.49                                |                                    |                                       | 1.477599       | 15.170                                             | 65.87                                    | 165.2                                                               | 1457                                    | 1904                               |
| 290.65                            | 1304.95                                |                                    |                                       | 1.476977       | 15.171                                             | 64.92                                    | 166.1                                                               | 1128                                    | 1472                               |
| 293.15                            | 1303.39                                |                                    |                                       | 1.476333       | 15.172                                             | 63.93                                    | 166.8                                                               | 882.3                                   | 1150                               |
| 295.65                            | 1301.82                                |                                    |                                       | 1.475696       | 15.173                                             | 62.95                                    | 167.5                                                               | 695.2                                   | 905.0                              |
| 298.15                            | 1300.25                                | 1994.45                            | 193.34                                | 1.475098       | 15.175                                             | 61.85                                    | 168.2                                                               | 553.0                                   | 719.1                              |
| 300.65                            | 1298.66                                | 1988.48                            | 194.74                                | 1.474470       | 15.176                                             | 60.89                                    | 169.2                                                               | 442.5                                   | 574.7                              |
| 303.15                            | 1297.09                                | 1982.34                            | 196.19                                | 1.473853       | 15.177                                             | 59.90                                    | 169.8                                                               | 358.6                                   | 465.1                              |
| 305.65                            | 1295.51                                | 1976.29                            | 197.63                                | 1.473231       | 15.179                                             | 59.16                                    | 170.8                                                               | 292.9                                   | 379.4                              |
| 308.15                            | 1293.93                                | 1970.43                            | 199.05                                | 1.472610       | 15.180                                             | 58.13                                    | 171.5                                                               | 241.1                                   | 312.0                              |
| 310.65                            | 1292.34                                | 1964.64                            | 200.47                                | 1.471971       | 15.181                                             | 57.35                                    | 172.5                                                               | 199.8                                   | 258.2                              |
| 313.15                            | 1290.73                                | 1958.92                            | 201.90                                | 1.471345       | 15.183                                             | 55.90                                    | 173.2                                                               | 167.3                                   | 216.0                              |
| 315.65                            | 1289.10                                | 1953.23                            | 203.33                                | 1.470698       | 15.184                                             | 55.10                                    | 173.8                                                               | 141.3                                   | 182.2                              |
| 318.15                            | 1287.47                                | 1947.54                            | 204.78                                | 1.470057       | 15.186                                             | 53.91                                    | 174.6                                                               | 118.4                                   | 152.4                              |

**Table S1.** Continuation.

| $T / \text{K}$ | $\rho / (\text{kg}\cdot\text{m}^{-3})$ | $u / (\text{m}\cdot\text{s}^{-1})$ | $\kappa_{\text{S}} / \text{TPa}^{-1}$ | $n_{\text{D}}$ | $R_{\text{m}} / (\text{cm}^3\cdot\text{mol}^{-1})$ | $\sigma / (\text{mN}\cdot\text{m}^{-1})$ | $C_{\text{p,m}} / (\text{J}\cdot\text{mol}^{-1}\cdot\text{K}^{-1})$ | $\nu / (\text{mm}^2\cdot\text{s}^{-1})$ | $\eta / (\text{mPa}\cdot\text{s})$ |
|----------------|----------------------------------------|------------------------------------|---------------------------------------|----------------|----------------------------------------------------|------------------------------------------|---------------------------------------------------------------------|-----------------------------------------|------------------------------------|
| 320.65         | 1285.82                                | 1941.86                            | 206.25                                | 1.469422       | 15.188                                             | 52.94                                    | 175.6                                                               | 107.2                                   | 137.9                              |
| 323.15         | 1284.17                                | 1936.17                            | 207.73                                | 1.468768       | 15.189                                             | 51.97                                    | 176.5                                                               | 92.65                                   | 119.0                              |
| 325.65         | 1282.51                                | 1930.48                            | 209.22                                | 1.468138       | 15.191                                             | 50.98                                    | 177.1                                                               | 80.11                                   | 102.7                              |
| 328.15         | 1280.85                                | 1924.77                            | 210.74                                | 1.467479       | 15.192                                             | 50.02                                    | 178.1                                                               | 69.27                                   | 88.72                              |
| 330.65         | 1279.18                                | 1919.04                            | 212.28                                | 1.466839       | 15.194                                             | 49.54                                    | 178.8                                                               | 60.31                                   | 77.15                              |
| 333.15         | 1277.50                                | 1913.29                            | 213.83                                | 1.466187       | 15.196                                             | 48.54                                    | 179.6                                                               | 52.64                                   | 67.24                              |
| 335.65         | 1275.81                                | 1907.50                            | 215.42                                | 1.465526       | 15.198                                             | 47.54                                    | 180.5                                                               | 46.27                                   | 59.04                              |
| 338.15         | 1274.12                                | 1901.67                            | 217.03                                | 1.464875       | 15.199                                             | 46.54                                    | 181.3                                                               | 40.92                                   | 52.13                              |

<sup>a</sup> Standard uncertainties  $u$  are  $u(T) = 0.005 \text{ K}$  for density and speed of sound and  $u(T) = 0.01 \text{ K}$  for the rest of properties,  $u(p) = 1 \text{ kPa}$ , and the combined expanded uncertainties  $U_c$  are  $U_c(\rho) = 0.1 \text{ kg}\cdot\text{m}^{-3}$ ,  $U_c(u) = 0.5 \text{ m}\cdot\text{s}^{-1}$ ,  $U_c(n_{\text{D}}) = 5\cdot 10^{-5}$ ,  $U_c(\sigma) = 0.5 \text{ mN}\cdot\text{m}^{-1}$ ,  $U_c(\nu) = 1 \%$ ,  $U_c(\eta) = 1 \%$ ,  $U_c(\kappa) = 1 \%$ , with 0.95 level of confidence ( $k = 2$ ).
